# Supplementary material for: Construction of phase-separated Co/MnO synergistic catalysts and integration onto sponge for rapid removal of multiple contaminants
Source: Royal Society of Chemistry journal article supplement (doi:10.1039/d4mh00285g), 2024-01-01
Supplement: d4mh00285g1.pdf [file d4mh00285g1.pdf]

Supporting Information

## **Construction of phase-separated Co/MnO synergistic catalysts and integration onto sponge for rapid removing multiple contaminants**

Mengting Liu<sup>a</sup>, Wanyu Zhang<sup>a</sup>, Ruiting Ni<sup>a</sup>, Zhenxiao Wang<sup>a</sup>, Hongyao Zhao<sup>a</sup>, Xiu Zhong<sup>a</sup>, Yanyun Wang<sup>a</sup>, Danhong Shang<sup>a</sup>, Zengjing Guo<sup>b</sup>, Edison Huixiang Ang<sup>b,\*</sup>, Fu Yang<sup>a,\*</sup>

[<sup>a</sup>] School of Environmental and Chemical Engineering, Jiangsu University of Science and Technology, Zhenjiang 212003, Jiangsu, P. R. China

[<sup>b</sup>] Natural Sciences and Science Education, National Institute of Education, Nanyang Technological University, Singapore 637616, Singapore

[<sup>c</sup>] School of Chemistry and Chemical Engineering, Liaocheng University, Liaocheng 252000, Shandong, PR China

\*Corresponding Authors: E-mail addresses: [edison.ang@nie.edu.sg](mailto:edison.ang@nie.edu.sg) (E. H. Ang), [fuyang@just.edu.cn](mailto:fuyang@just.edu.cn) (F. Yang)

**Table. S1** ICP measurement results of Mn and Co content in different comparative catalysts and metal leaching fraction of different catalysts.

**Table. S2** Detailed structural properties including surface area, total pore volume, and average pore diameter of MnOOH, Mn<sub>2</sub>O<sub>3</sub>-600, Mn<sub>3</sub>O<sub>4</sub>/C-600, Mn<sub>3</sub>O<sub>4</sub>/Co-600, MnO@Co/C-500, MnO@Co/C-600, MnO@Co/C-600.

**Table. S3** Toxicity assessment of various intermediates from tetracycline bisphenol A degradation.

**Fig. S1** Structural formula of BPA.

**Fig. S2.** Representative SEM of (a) MnOOH, (b) Mn<sub>2</sub>O<sub>3</sub>-600, (c) Mn<sub>3</sub>O<sub>4</sub>/Co-600.

**Fig. S3** (a,b) N<sub>2</sub> adsorption/desorption isotherm and (c,d) corresponding pore size distribution of comparative catalysts MnOOH, Mn<sub>2</sub>O<sub>3</sub>-600, Mn<sub>3</sub>O<sub>4</sub>/C-600, Mn<sub>2</sub>O<sub>3</sub>/Co-600, MnO@Co/C-500, MnO@Co/C-600, MnO@Co/C-700.

**Fig. S4** Jahn-Teller distortions for octahedral Mn complex.

**Fig. S5** Electrochemical impedance spectra (EIS) for different samples

**Fig. S6** Charging current density difference and cyclic voltammetry (CV) scanning rate of catalysts (a), analysis of the electrochemical active surface area (ECSA): Cyclic voltammetric curves for different scan rates (20-120 mV s<sup>-1</sup>) and (b) Mn<sub>3</sub>O<sub>4</sub>/C-600, (c) MnO@Co/C-500, (d) MnO@Co/C-600, (e) MnO@Co/C-700 samples in the range from -0.2 to 0.3 V vs. RHE.

**Fig. S7** (a) Time-dependent BPA degradation course curves over MnO@Co/C-600 using different PMS dosages, and (b) corresponding kinetic curves: ln(C<sub>0</sub>/C) v.s. reaction time; (c) Time-dependent BPA degradation course curves over MnO@Co/C-600 using catalyst dosages, and (d) corresponding kinetic curves: ln(C<sub>0</sub>/C) v.s. reaction time; (e) Time-dependent BPA degradation course curves over MnO@Co/C-600 using different BPA concentration, and (f) corresponding kinetic curve: ln(C<sub>0</sub>/C) v.s. (g) Time-dependent BPA degradation course curves over MnO@Co/C-600 using different BPA concentration, and (h) corresponding kinetic curve: ln(C<sub>0</sub>/C) v.s. reaction time.

**Fig. S8** Contribution of different quenchers to quenched active radicals.

**Fig. S9** Time-dependent BPA degradation course curves over MnO@Co/C-600 using different anion.

**Fig. S10** BPA degradation course curves by MnO@Co/C-600 system in actual water samples; (b) Different pollutions degradation course curves in MnO@Co/C-600 system; (c) The cycling experiment results of MnO@Co/C-600 in activation of PMS for BPA degradation.

**Fig. S11** (a) Degradation progress curves of BPA using the MnO@Co/C-600 system in authentic water samples; (b) Degradation progress curves of different pollutants in the MnO@Co/C-600 system; (c) Results of cycling experiments with MnO@Co/C-600 in activating PMS for BPA degradation; (d) Total Organic Carbon (TOC) removal progress curves using the MnO@Co/C-600 system for different pollutants;

**Fig. S12** (a) The schematic diagram of circulation filter integrated device; (b) BPA degradation course curves by MnO@Co/C-600 system under flow-through conditions;

**Fig. S13** Time-dependent surface temperature thermal IR images of wet MnO@Co/C-600 samples under one sun irradiation in air.

**Table. S1** ICP measurement results of Mn and Co content in different comparative catalysts and metal leaching fraction of different catalysts.

| Samples                                | Mn (wt. %) | Co (wt. %) | Total (wt. %) | Co leaching (wt. %) | Mn leaching (wt. %) |
|----------------------------------------|------------|------------|---------------|---------------------|---------------------|
| MnOOH                                  | 58.90      | /          | 58.90         | /                   | /                   |
| Mn <sub>2</sub> O <sub>3</sub> -600    | 64.01      | /          | 64.01         | /                   | /                   |
| Mn <sub>3</sub> O <sub>4</sub> /C-600  | 43.86      | /          | 43.86         | /                   | /                   |
| Mn <sub>3</sub> O <sub>4</sub> /Co-600 | 45.85      | 6.05       | 51.90         | 20.3                | 12.4                |
| MnO@Co/C-500                           | 44.88      | 6.27       | 51.15         | /                   | /                   |
| MnO@Co/C-600                           | 49.24      | 6.89       | 56.13         | 3.9                 | 2.1                 |
| MnO@Co/C-700                           | 51.86      | 8.47       | 60.33         | /                   | /                   |

**Table. S2** Detailed structural properties including surface area, total pore volume, and average pore diameter of MnOOH, Mn<sub>2</sub>O<sub>3</sub>-600, Mn<sub>3</sub>O<sub>4</sub>/C-600, Mn<sub>3</sub>O<sub>4</sub>/Co-600, MnO@Co/C-500, MnO@Co/C-600, and MnO@Co/C-600.

| Samples                                | S <sub>BET</sub> (m <sup>2</sup> /g) | Total pore volume (cm <sup>3</sup> /g) | Average pore diameter (nm) |
|----------------------------------------|--------------------------------------|----------------------------------------|----------------------------|
| MnOOH                                  | 70.8                                 | 0.23                                   | 13.0                       |
| Mn <sub>2</sub> O <sub>3</sub> -600    | 7.9                                  | 0.06                                   | 31.8                       |
| Mn <sub>3</sub> O <sub>4</sub> /C-600  | 155.2                                | 0.14                                   | 3.5                        |
| Mn <sub>3</sub> O <sub>4</sub> /Co-600 | 21.2                                 | 0.06                                   | 10.4                       |
| MnO@Co/C-500                           | 28.9                                 | 0.30                                   | 41.6                       |
| MnO@Co/C-600                           | 112.7                                | 0.35                                   | 12.4                       |
| MnO@Co/C-700                           | 2.5                                  | 0.02                                   | 29.7                       |

**Table. S3** Toxicity assessment of various intermediates from tetracycline bisphenol A degradation.

| Compounds | Molecular Formula                                                                   | Acute toxicity       |                               |                             |                       |
|-----------|-------------------------------------------------------------------------------------|----------------------|-------------------------------|-----------------------------|-----------------------|
|           |                                                                                     | Fish LC50 (96h mg/L) | Daphnia magna LC50 (48h mg/L) | Pyriformis IGC50 (48h mg/L) | Oral rat LD50 (mg/kg) |
| P         | 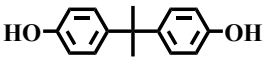   | 3.24                 | 1.58                          | 5.30                        | 4108.99               |
| P1        |    | 2.32                 | 1.59                          | 4.55                        | 1140.28               |
| P2        |    | 2.21                 | 9.73                          | 0.98                        | 2346.85               |
| P3        |    | -                    | -                             | -                           | -                     |
| P4        |   | 0.46                 | 2.02                          | 5.92                        | 3683.42               |
| P5        |  | -                    | -                             | -                           | -                     |
| P6        |  | 0.21                 | 0.40                          | 0.11                        | 558.97                |
| P7        |  | 0.37                 | 0.80                          | 1.70                        | 2554.43               |
| P8        |  | 2.04                 | 0.56                          | 6.40                        | 1229.06               |

|                          |                        |                    |                       |
|--------------------------|------------------------|--------------------|-----------------------|
| Not harmful<br>>100 mg/L | Harmful<br>10-100 mg/L | Toxic<br>1-10 mg/L | Very toxic<br><1 mg/L |
|--------------------------|------------------------|--------------------|-----------------------|

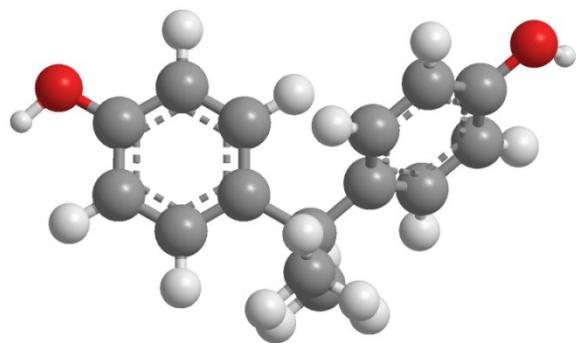

**Fig. S1** Molecular structure of BPA.

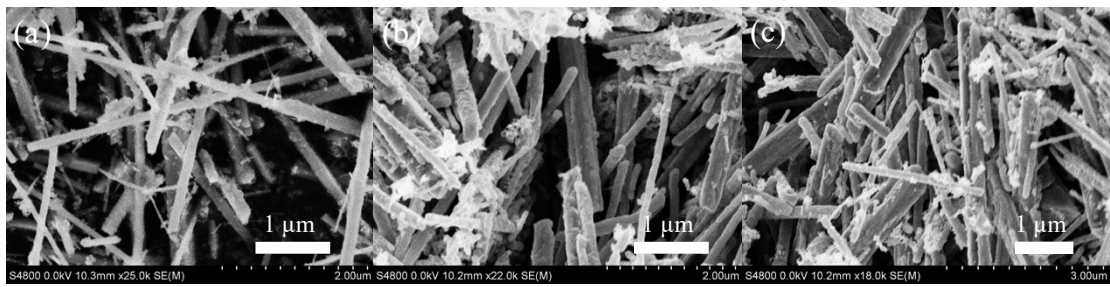

**Fig S2.** SEM images of (a) MnOOH, (b) Mn<sub>2</sub>O<sub>3</sub>-600, (c) Mn<sub>3</sub>O<sub>4</sub>/Co-600.

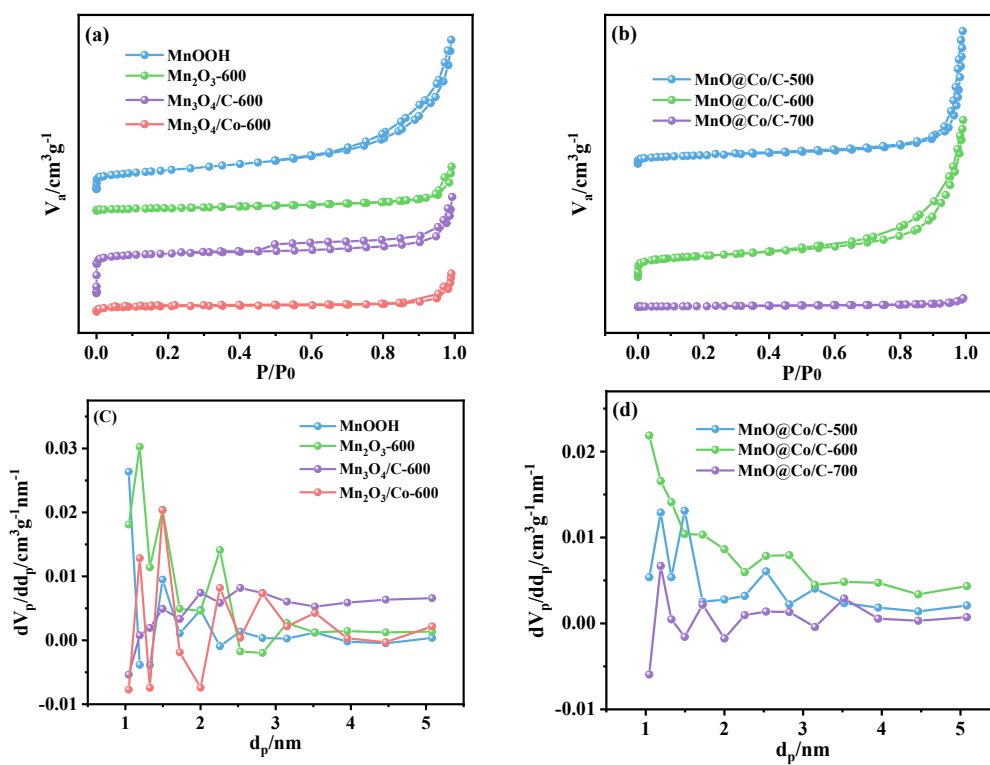

**Fig. S3** (a, b) N<sub>2</sub> adsorption/desorption isotherm and (c, d) corresponding pore size distribution curves of comparative catalysts: MnOOH, Mn<sub>2</sub>O<sub>3</sub>-600, Mn<sub>3</sub>O<sub>4</sub>/C-600, Mn<sub>2</sub>O<sub>3</sub>/Co-600, MnO@Co/C-500, MnO@Co/C-600, and MnO@Co/C-700.



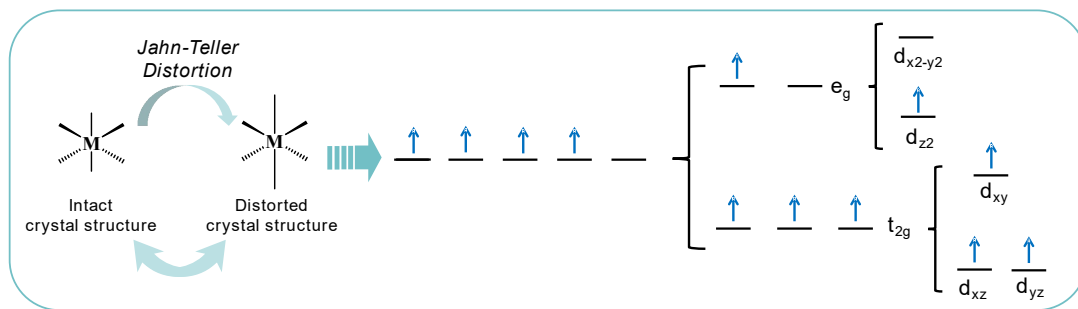

**Fig. S4** Jahn-Teller distortions for octahedral Mn complex.

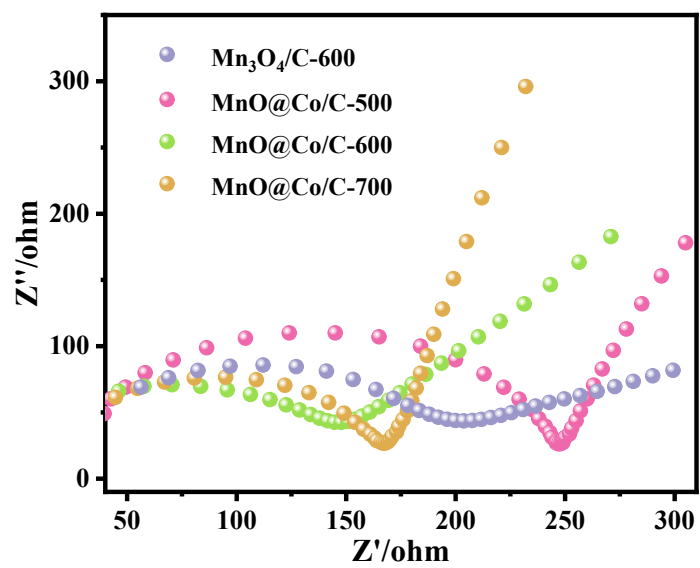

**Fig. S5** Electrochemical impedance spectra (EIS) for different samples.

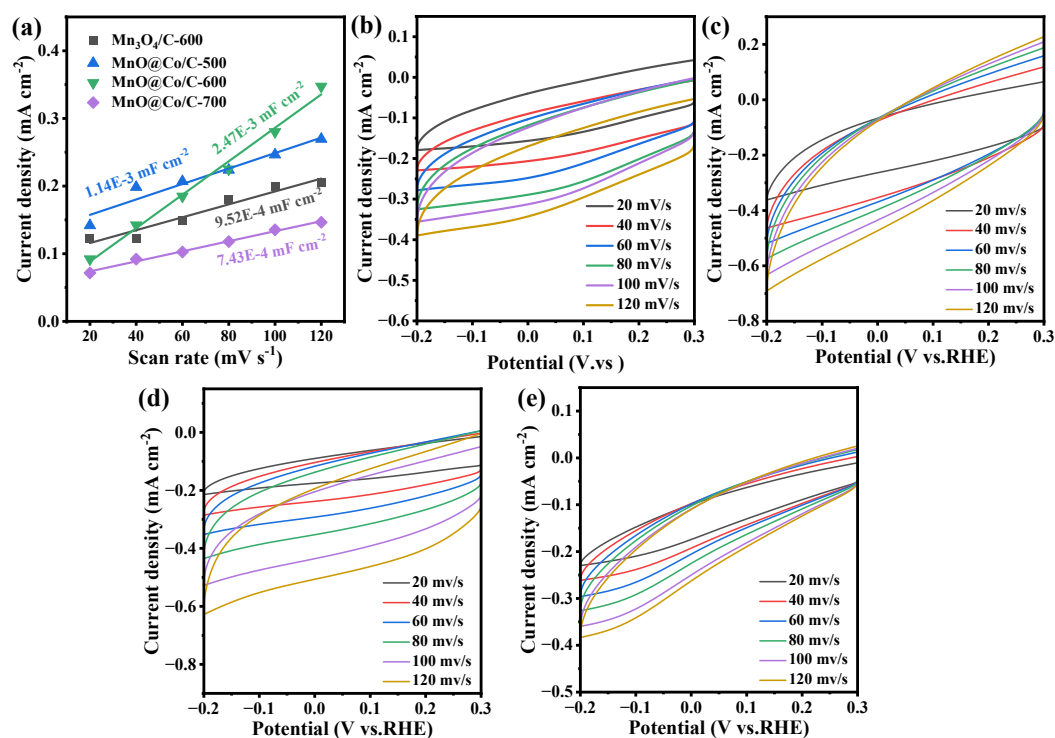

**Fig. S6** Charging current density difference and cyclic voltammetry (CV) scanning rate of catalysts: (a) analysis of the electrochemical active surface area (ECSA): Cyclic voltammetric curves for different scan rates (20-120 mV s<sup>-1</sup>) and (b) Mn<sub>3</sub>O<sub>4</sub>/C-600, (c) MnO@Co/C-500, (d) MnO@Co/C-600, (e) MnO@Co/C-700 samples in the range from -0.2 to 0.3 V vs. RHE.

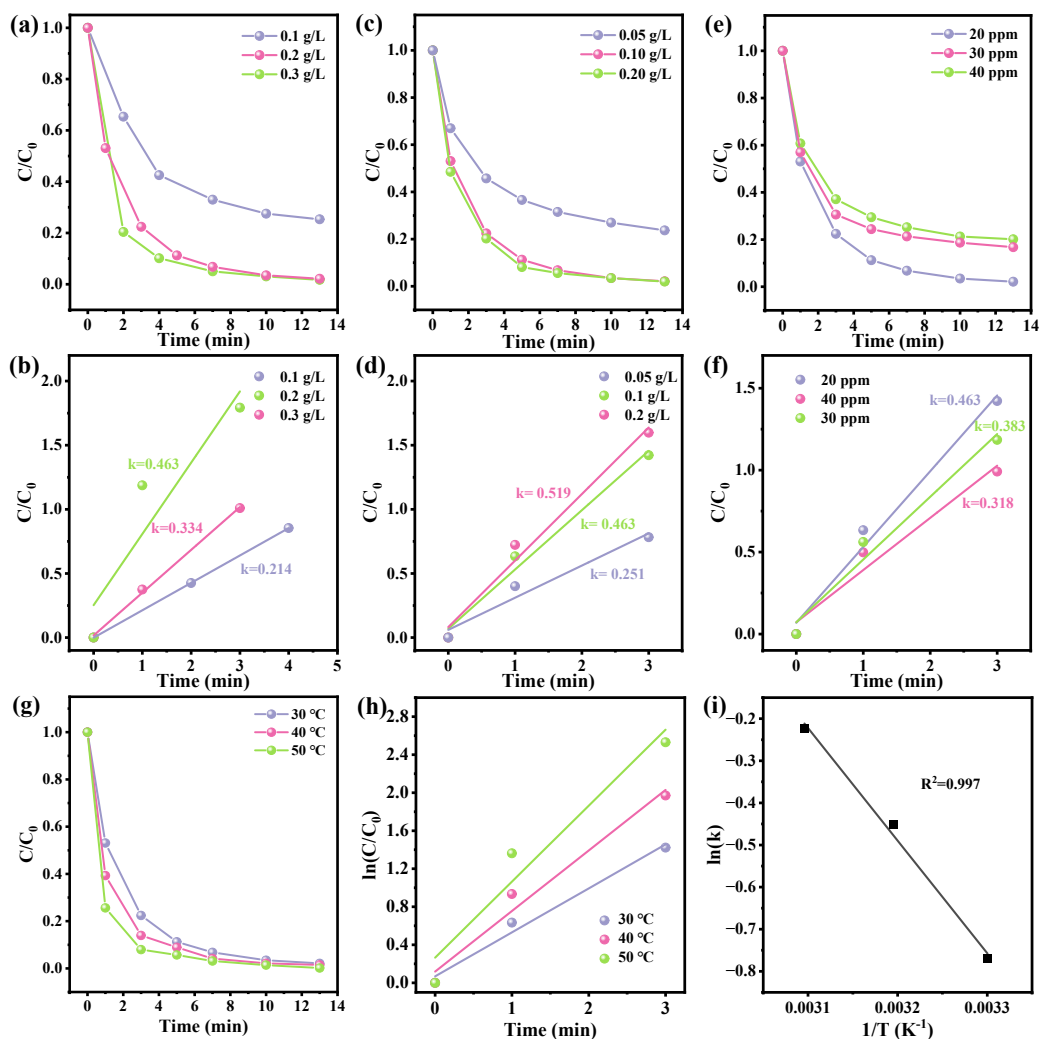

**Fig. S7** (a) Time-dependent BPA degradation course curves over MnO@Co/C-600 using different PMS dosages, and (b) the corresponding kinetic curves:  $\ln(C_0/C)$  v.s. reaction time; reaction condition:  $[BPA] = 20 \text{ mg L}^{-1}$ ,  $[catalyst] = 0.1 \text{ g L}^{-1}$ . (c) Time-dependent BPA degradation course curves over MnO@Co/C-600 using catalyst dosages, and (d) the corresponding kinetic curves:  $\ln(C_0/C)$  v.s. reaction time; reaction condition:  $[BPA] = 20 \text{ mg L}^{-1}$ ,  $[PMS] = 0.2 \text{ g L}^{-1}$ . (e) Time-dependent BPA degradation course curves over MnO@Co/C-600 using different BPA concentration, and (f) the corresponding kinetic curve:  $\ln(C_0/C)$  v.s. reaction time; reaction condition:  $[catalyst] = 0.1 \text{ g L}^{-1}$ ,  $[PMS] = 0.2 \text{ g L}^{-1}$ . (g) Time-dependent BPA degradation course curves over MnO@Co/C-600 using different BPA concentration, and (h) the corresponding kinetic curve:  $\ln(C_0/C)$  v.s. reaction time; reaction condition:  $[catalyst] = 0.1 \text{ g L}^{-1}$ ,  $[PMS] = 0.2 \text{ g L}^{-1}$ . (i) Arrhenius plots derived from corresponding kinetic curves of MnO@Co/C-600:  $\ln(k)$  v.s.  $T^{-1}$

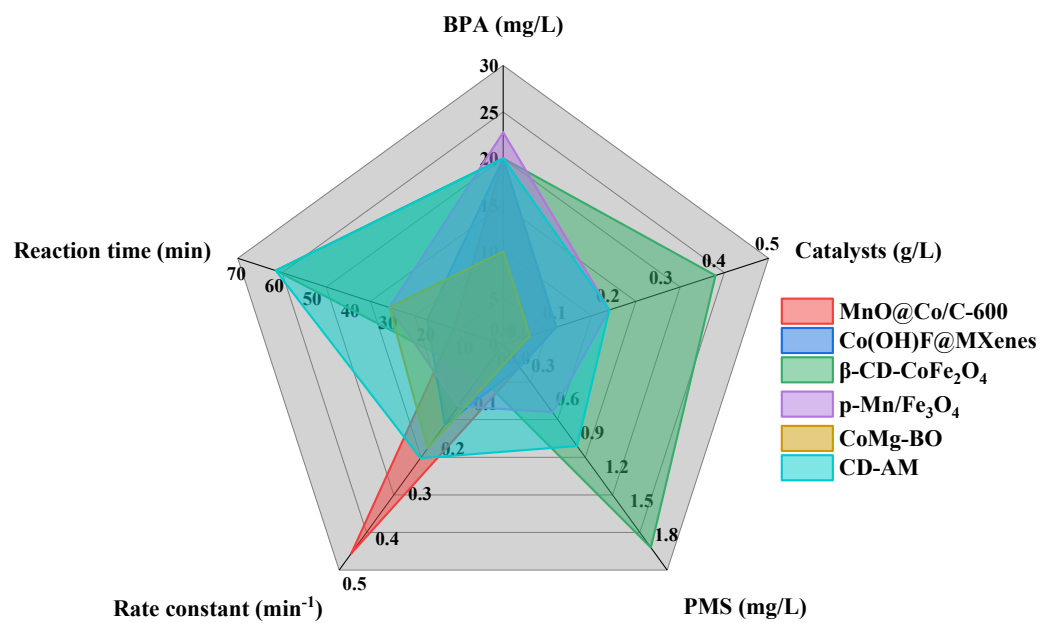

**Fig. S8** Comparison of different catalysts activating PMS to remove BPA.

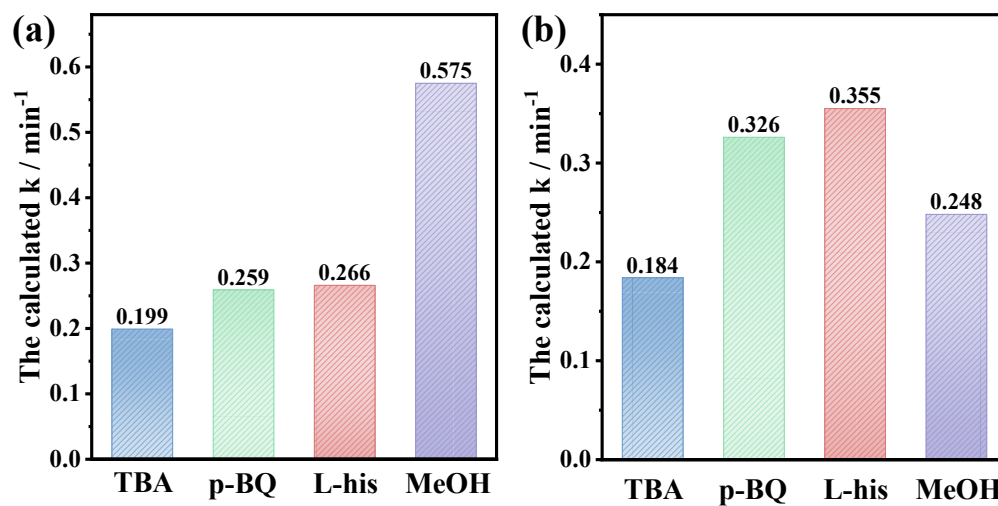

**Fig. S9** Contribution of different quenchers to quenched active radicals.

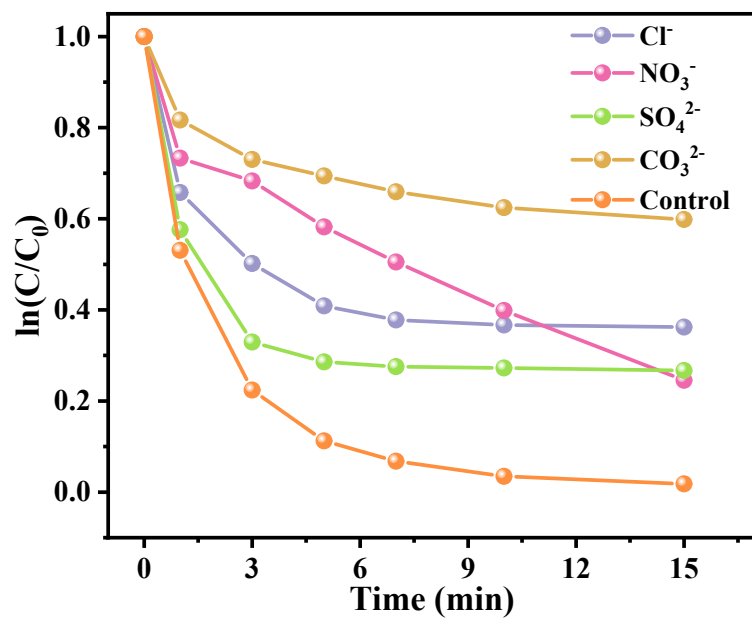

**Fig. S10** Time-dependent BPA degradation course curves over MnO@Co/C-600 using different anion.

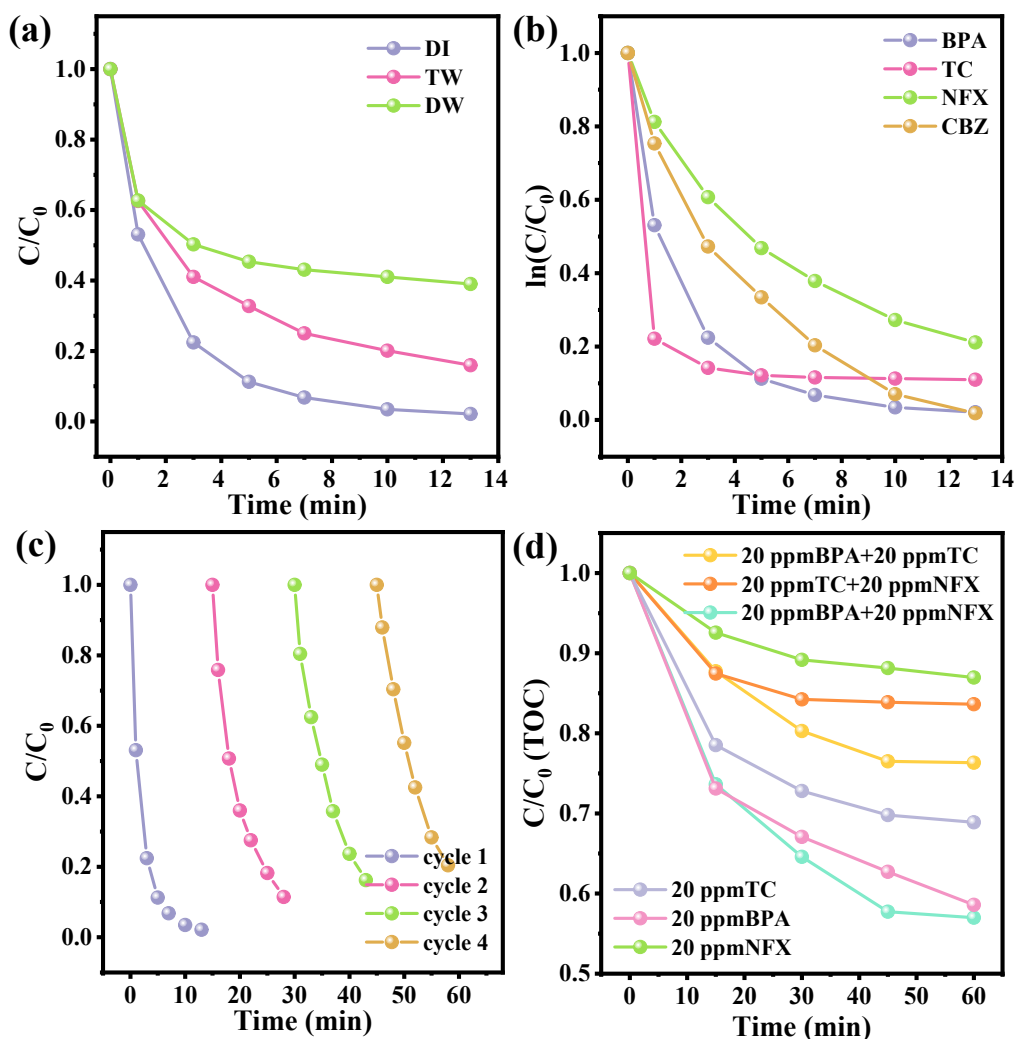

**Fig. S11** (a) Degradation progress curves of BPA using the MnO@Co/C-600 system in authentic water samples; reaction conditions: [BPA] = 20 mg L<sup>-1</sup>, [PMS] = 0.2 g L<sup>-1</sup>, [catalyst] = 0.1 g L<sup>-1</sup>, Temperature = 25 °C. (b) Degradation progress curves of different pollutants in the MnO@Co/C-600 system; reaction conditions: [pollutants] = 20 mg L<sup>-1</sup>, [PMS] = 0.2 g L<sup>-1</sup>, temperature = 25 °C. (c) Results of cycling experiments with MnO@Co/C-600 in activating PMS for BPA degradation; reaction conditions: [BPA] = 20 mg L<sup>-1</sup>, [PMS] = 0.2 g L<sup>-1</sup>, [catalyst] = 0.1 g L<sup>-1</sup>, temperature = 25 °C. (d) Total Organic Carbon (TOC) removal progress curves using the MnO@Co/C-600 system for different pollutants; Reaction conditions: [PMS] = 0.2 g L<sup>-1</sup>, [catalyst] = 0.1 g L<sup>-1</sup>, temperature = 25 °C.



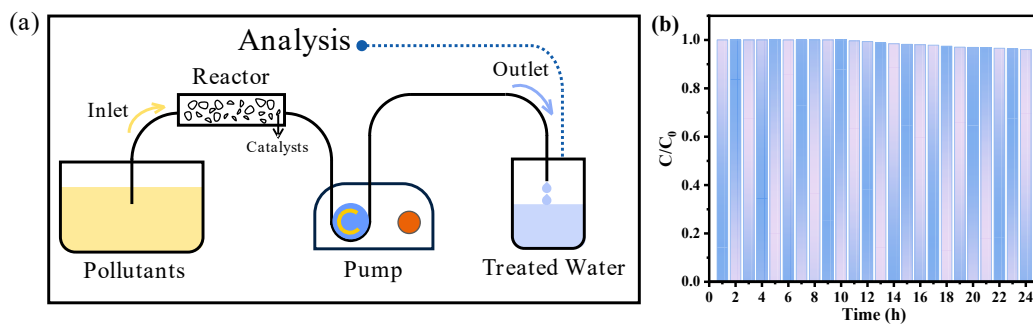

**Fig. S12** (a) The schematic diagram of circulation filter integrated device; (b) BPA degradation course curves by MnO@Co/C-600 system under flow-through conditions; Reaction condition: [BPA] = 5 mg L<sup>-1</sup>, [PMS] = 0.2 g L<sup>-1</sup>, [catalyst] = 20 mg, Temperature = 25 °C.

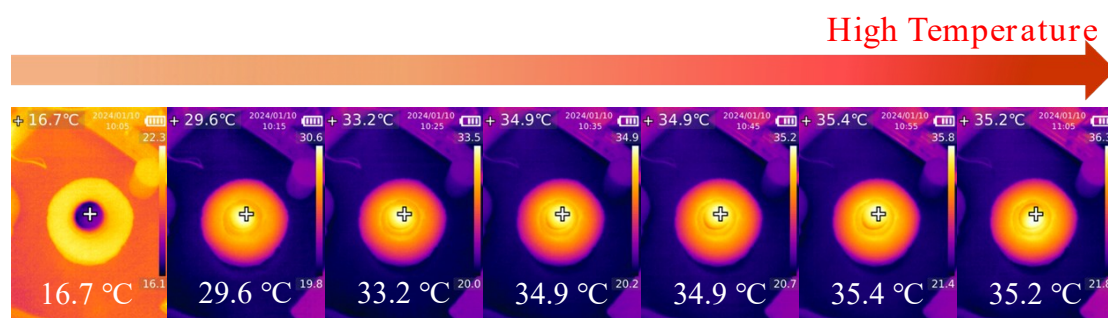

**Fig. S13** Time-dependent surface temperature thermal IR images of wet MnO@Co/C-600 samples under one sun irradiation in air.
